# Supplementary material for: Hemodynamic Predictors for Sepsis-Induced Acute Kidney Injury: A Preliminary Study
Source: PubMed Central journal article supplement (PMC7019750; doi:10.3390/jcm9010151), 2020-01-06
Supplement: jcm-09-00151-s001.pdf [file jcm-09-00151-s001.pdf]

**A. Fluid resuscitation protocol in the absence of advanced hemodynamic monitoring**

20-30 mL/kg crystalloids initial fluid load

PPV >12% at PLR, additional 250 mL fluid bolus was administered

CVP > 12 mm Hg or other signs of fluid overload, stop fluid administration

RBC transfusion to maintain a hemoglobin  $\geq 7$  g/dL

Norepinephrine to maintain a MAP  $\geq 65$  mm Hg

Urine output  $\geq 0.5$  mL/kg

CRT  $\leq 3$  seconds

**B. Fluid resuscitation protocol guided by advanced hemodynamic monitoring**

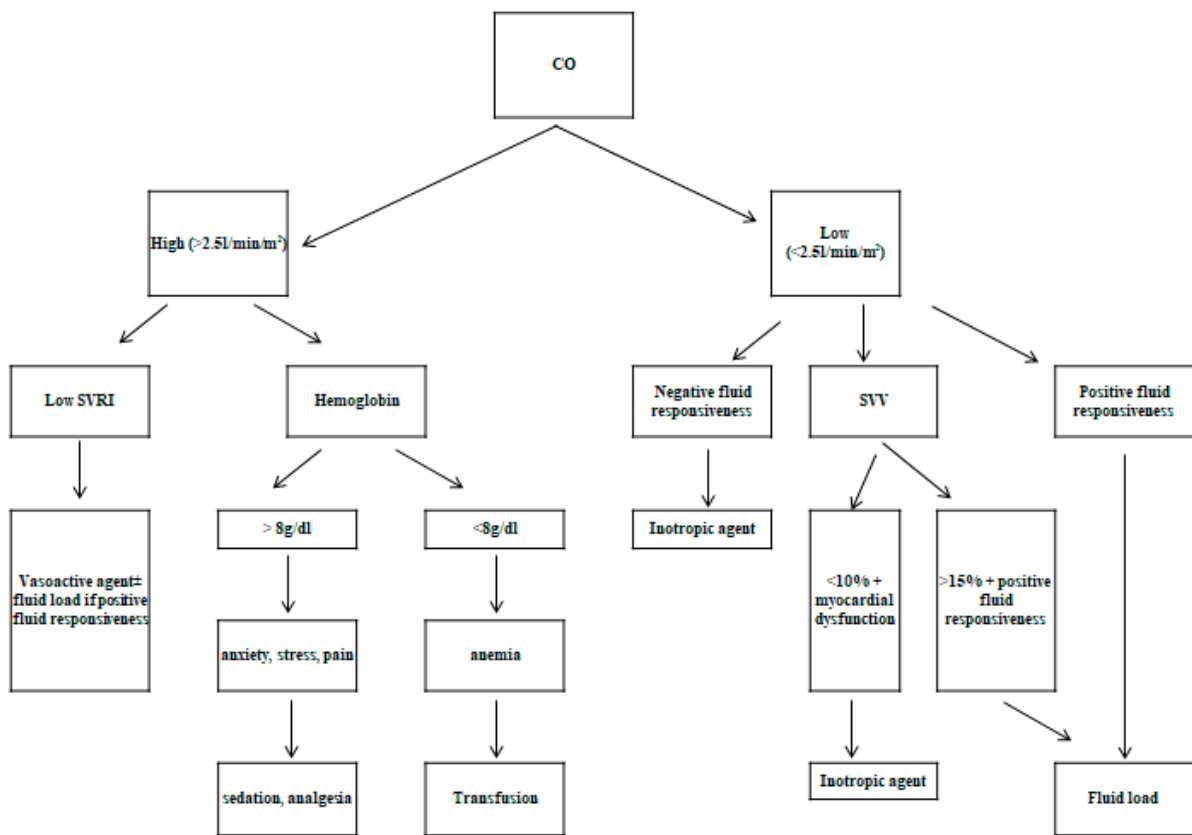

**Supplemental Material 1.** Fluid responsiveness was defined as an increase  $\geq 15\%$  in stroke volume (SV) at passive leg rising maneuver; CO: cardiac output; SVRI: systemic vascular resistance index; SVV: stroke volume variation.

**Supplemental material 2: The hemodynamic parameters of the patients included in the study.**

|                                                            | Time Zero (T <sub>0</sub> )   | 3 <sup>rd</sup> H | <i>p</i> Value* | 6 <sup>th</sup> H | <i>p</i> Value** | 24 <sup>th</sup> H | <i>p</i> Value*** |
|------------------------------------------------------------|-------------------------------|-------------------|-----------------|-------------------|------------------|--------------------|-------------------|
| Heart rate b/min<br>Mean±SD                                | 103.9±18.6                    | 98.7±18.8         | 0.10            | 99.7±20.2         | 0.2              | 96.7±16.9          | 0.02              |
| Systolic blood pressure<br>mm Hg Mean±SD                   | 118.0 ±21.0                   | 122.7±18.1        | 0.15            | 127.3±17.8        | 0.005            | 130.5±17.9         | 0.0006            |
| Diastolic blood pressure<br>mm Hg Mean±SD                  | 56.6±13.1                     | 55.5±11.8         | 0.60            | 57.6 ±11.6        | 0.62             | 60.4±12.3          | 0.14              |
| Mean arterial blood<br>pressure mm Hg<br>Mean±SD           | 75.2±13.6                     | 74.8±11.6         | 0.86            | 78.4±12.1         | 0.14             | 81.2±13.4          | 0.009             |
| Central venous pressure<br>mm Hg Mean±SD                   | 7.34±4.64                     | 8.5±4.7           | 0.13            | 9.1±4.7           | 0.03             | 8.3±4.52           | 0.22              |
| CI l/min Mean±SD                                           | not monitored at<br>time zero | 3.5±0.7           |                 | 3.6±1.01          | 0.3              | 3.27±0.68          | 0.75              |
| SVI Mean±SD<br>ml/m <sup>2</sup> /beat)                    |                               | 35.7±10.7         |                 | 37.2±12.5         | 0.44             | 33.1±8.6           | 0.45              |
| GEDI Mean±SD ml/kg                                         |                               | 647.5±166.7       |                 | 632.5±219.6       | 0.79             | 605.1±120.6        | 0.16              |
| ITBI Mean±SD ml/m <sup>2</sup>                             |                               | 829.7±233.1       |                 | 840.2±275.6       | 0.84             | 776.4±247.6        | 0.10              |
| ELWI Mean±SD<br>ml/kg                                      |                               | 8.75±3.76         |                 | 9.4±4.3           | 0.75             | 8.8±2.2            | 0.48              |
| SVRI Mean±SD<br>dynes-sec/cm <sup>-5</sup> /m <sup>2</sup> |                               | 1620.6±473.4      |                 | 1609.9±495.8      | 0.86             | 1678.0±588.0       | 0.36              |
| Norepinephrine<br>Mean±SD mcg/kg/min                       |                               | 0.12±0.15         |                 | 0.11±0.14         | 0.49             | 0.14±0.18          | 0.15              |
| VDI Mean±SD                                                | 0.12±.15)                     | 0.16±0.21         | 0.54            | 0.20±0.26         | 0.30             | 0.28±0.30          | 0.94              |
| Creatinine Mean±SD<br>µmol/l                               | 218.3±192.7                   |                   |                 |                   |                  | 200.7±174.2        | 0.45              |
| Urea Mean±SD mmol/l                                        | 16.2±12.1                     |                   |                 |                   |                  | 16.1±11.3          | 0.86              |
| lactate (septic shock<br>patients) Mean±SD<br>mmol/l       | 3.9±2.5                       | 3.8±3.0           | 0.30            | 3.8±3.1           | 0.30             | 2.3±2.8            | < 0.0001          |
| oliguria/anuria no of<br>patients (%)                      | 40 (56.3)                     | 28 (39.4)         | 0.04            | 24 (33.8)         | 0.006            | 19 (26.7)          | 0.0003            |
| Capillary refill time >3<br>sec no of patients (%)         | 17 (23.9))                    | 12 (16.9)         | 0.29            | 8 (11.2)          | 0.04             | 4 (5.7)            | 0.002             |

Time 0 (T<sub>0</sub>): time of study inclusion (ICU); 3<sup>rd</sup>, 6<sup>th</sup>, 24<sup>th</sup> hour: the transpulmonary thermodilution calibrations performed in Ev1000 Edwards Lifesciences® at these time frames; \* comparison between time zero and 3rd hour; \*\* comparison between time zero and 6<sup>th</sup> hour, except CI, SVI, GEDI, ITBI, ELWI (comparison with 3rd h) ITBI, ELWI (comparison with 3rd hour); \*\*\* comparison between time zero and 24th h, except CI, SVI, GEDI, ITBI, ELWI (comparison with 3<sup>rd</sup> h)
